# Supplementary material for: Lanthanide mixed-ligand complexes of the [Ln(CAPh)3(Phen)] and [LaxEu1−x(CAPh)3(Phen)] (CAPh = carbacylamidophosphate) type. A comparative study of their spectral properties
Source: Royal Society of Chemistry journal article supplement (doi:10.1039/c5dt02557e), 2015-01-01
Supplement: c5dt02557e1.pdf [file c5dt02557e1.pdf]

Electronic Supporting Information

**Lanthanide Mixed-Ligand Complexes of the Ln(CAPh)<sub>3</sub>Phen and La<sub>x</sub>Eu<sub>1-x</sub>(CAPh)<sub>3</sub>Phen (CAPh = carbacylamidophosphate) type. Comparative Study of Their Spectral Properties**

Olena O. Litsis\*, Vladimir A. Ovchynnikov, Vasyl P. Scherbatskii, Sergiy G. Nedilko, Tatiana Yu. Sliva, Viktoriya V. Dyakonenko, Oleg V. Shishkin, Paula Gawryszewska, Vladimir M. Amirkhanov

**Table S1** Element analyzes for the compounds synthesized

| Compound                                                        | Color       | M <sub>w</sub> | % Found (Calcd.) |         |        |         |
|-----------------------------------------------------------------|-------------|----------------|------------------|---------|--------|---------|
|                                                                 |             |                | Ln               | C       | H      | N       |
| [La(Pip) <sub>3</sub> Phen]                                     | colorless   | 1445.8         | 9.57             | 39.02   | 4.54   | 10.12   |
|                                                                 |             | 2              | (9.61)           | (39.88) | (4.70) | (10.66) |
| [Ce(Pip) <sub>3</sub> Phen]                                     | orange      | 1447.0         | 9.53             | 38.90   | 4.61   | 10.32   |
|                                                                 |             | 4              | (9.68)           | (39.84) | (4.70) | (10.65) |
| [Pr(Pip) <sub>3</sub> Phen]                                     | light green | 1447.8         | 9.54             | 39.23   | 4.56   | 10.48   |
|                                                                 |             | 2              | (9.73)           | (39.82) | (4.70) | (10.64) |
| [Nd(Pip) <sub>3</sub> Phen]                                     | pale blue   | 1451.1         | 9.87             | 38.80   | 4.60   | 10.04   |
|                                                                 |             | 6              | (9.94)           | (39.73) | (4.69) | (10.62) |
| [Sm(Pip) <sub>3</sub> Phen]                                     | colorless   | 1457.3         | 10.27            | 38.67   | 4.56   | 9.64    |
|                                                                 |             | 2              | (10.32)          | (39.56) | (4.67) | (10.57) |
| [Eu(Pip) <sub>3</sub> Phen]                                     | colorless   | 1458.8         | 10.38            | 38.49   | 4.58   | 9.77    |
|                                                                 |             | 8              | (10.42)          | (39.52) | (4.66) | (10.56) |
| [Gd(Pip) <sub>3</sub> Phen]                                     | colorless   | 1464.1         | 10.56            | 38.23   | 4.53   | 10.13   |
|                                                                 |             | 7              | (10.74)          | (39.38) | (4.64) | (10.52) |
| [Tb(Pip) <sub>3</sub> Phen]                                     | colorless   | 1465.8         | 10.60            | 38.30   | 4.48   | 10.03   |
|                                                                 |             | 4              | (10.84)          | (39.33) | (4.64) | (10.51) |
| [Dy(Pip) <sub>3</sub> Phen]                                     | colorless   | 1469.4         | 10.85            | 38.70   | 4.51   | 9.88    |
|                                                                 |             | 2              | (11.06)          | (39.24) | (4.63) | (10.49) |
| [Ho(Pip) <sub>3</sub> Phen]                                     | cream       | 1471.8         | 11.08            | 38.27   | 4.49   | 10.40   |
|                                                                 |             | 5              | (11.21)          | (39.17) | (4.62) | (10.47) |
| [Er(Pip) <sub>3</sub> Phen]                                     | light pink  | 1474.1         | 11.28            | 38.09   | 4.48   | 10.27   |
|                                                                 |             | 8              | (11.35)          | (39.11) | (4.61) | (10.45) |
| [Tm(Pip) <sub>3</sub> Phen]                                     | colorless   | 1475.8         | 11.26            | 38.10   | 4.55   | 10.33   |
|                                                                 |             | 5              | (11.45)          | (39.06) | (4.61) | (10.44) |
| [Yb(Pip) <sub>3</sub> Phen]                                     | colorless   | 1479.9         | 11.53            | 37.54   | 4.48   | 10.23   |
|                                                                 |             | 6              | (11.69)          | (38.96) | (4.59) | (10.41) |
| [Lu(Pip) <sub>3</sub> Phen]                                     | colorless   | 1481.8         | 11.77            | 38.17   | 4.46   | 9.97    |
|                                                                 |             | 9              | (11.81)          | (38.90) | (4.59) | (10.40) |
| [La <sub>0.95</sub> Eu <sub>0.05</sub> (Pip) <sub>3</sub> Phen] | colorless   | 1446.4         | 9.58             | 38.98   | 4.61   | 10.47   |
|                                                                 |             | 7              | (9.65)           | (39.86) | (4.70) | (10.65) |
| [La <sub>0.5</sub> Eu <sub>0.5</sub> (Pip) <sub>3</sub> Phen]   | colorless   | 1452.3         | 9.95             | 38.90   | 4.54   | 10.20   |
|                                                                 |             | 5              | (10.01)          | (39.70) | (4.68) | (10.61) |
| [La <sub>0.05</sub> Eu <sub>0.95</sub> (Pip) <sub>3</sub> Phen] | colorless   | 1458.2         | 10.32            | 38.48   | 4.56   | 10.20   |
|                                                                 |             | 3              | (10.38)          | (39.54) | (4.66) | (10.57) |

**Table S2** Main IR absorption bands and their assignments to the carbacylamidophosphate compounds, cm<sup>-1</sup>.

| Compound                                                         | Vibration Frequencies, cm <sup>-1</sup> |                           |                   |           |
|------------------------------------------------------------------|-----------------------------------------|---------------------------|-------------------|-----------|
|                                                                  | $\nu(\text{NH})$                        | $\nu(\text{C=O})$         | $\nu(\text{P=O})$ | AmideII   |
| HPip                                                             | 3027 m,b                                | 1729 vs,sp                | 1194 s,sp         | 1430 m,sp |
| NaPip                                                            | -                                       | 1637 vs,sp                | 1136 s,sp         | 1358 m,sp |
| [La(Pip) <sub>3</sub> Phen]                                      | -                                       | 1603 vs,sp,<br>1609 vs,sp | 1109 s,sp         | 1334 m,sp |
| [Ce(Pip) <sub>3</sub> Phen]                                      | -                                       | 1603 vs,sp,<br>1610 vs,sp | 1108 s,sp         | 1335 m,sp |
| [Pr(Pip) <sub>3</sub> Phen]                                      | -                                       | 1603 vs,sp,<br>1609 vs,sp | 1109 s,sp         | 1335 m,sp |
| [Nd(Pip) <sub>3</sub> Phen]                                      | -                                       | 1603 vs,sp,<br>1609 vs,sp | 1112 s,sp         | 1337 m,sp |
| [Sm(Pip) <sub>3</sub> Phen]                                      | -                                       | 1603 vs,sp,<br>1610 vs,sp | 1114 s,sp         | 1335 m,sp |
| [Eu(Pip) <sub>3</sub> Phen]                                      | -                                       | 1604 vs,sp,<br>1610 vs,sp | 1115 s,sp         | 1337 m,sp |
| [Gd(Pip) <sub>3</sub> Phen]                                      | -                                       | 1604 vs,sp,<br>1610 vs,sp | 1119 s,sp         | 1337 m,sp |
| [Tb(Pip) <sub>3</sub> Phen]                                      | -                                       | 1603 vs,sp,<br>1610 vs,sp | 1121 s,sp         | 1337 m,sp |
| [Dy(Pip) <sub>3</sub> Phen]                                      | -                                       | 1604 vs,sp,<br>1610 vs,sp | 1119 s,sp         | 1337 m,sp |
| [Ho(Pip) <sub>3</sub> Phen]                                      | -                                       | 1603 vs,sp,<br>1610 vs,sp | 1121 s,sp         | 1337 m,sp |
| [Er(Pip) <sub>3</sub> Phen]                                      | -                                       | 1603 vs,sp,<br>1610 vs,sp | 1119 s,sp         | 1338 m,sp |
| [Tm(Pip) <sub>3</sub> Phen]                                      | -                                       | 1603 vs,sp,<br>1610 vs,sp | 1119 s,sp         | 1337 m,sp |
| [Yb(Pip) <sub>3</sub> Phen]                                      | -                                       | 1603 vs,sp,<br>1609 vs,sp | 1122 s,sp         | 1337 m,sp |
| [Lu(Pip) <sub>3</sub> Phen]                                      | -                                       | 1603 vs,sp,<br>1610 vs,sp | 1122 s,sp         | 1337 m,sp |
| [La <sub>0.05</sub> Eu <sub>0.95</sub> (Pip) <sub>3</sub> Phen ] | -                                       | 1604 vs,sp,<br>1610 vs,sp | 1116 s,sp         | 1336 m,sp |
| [La <sub>0.5</sub> Eu <sub>0.5</sub> (Pip) <sub>3</sub> Phen]    | -                                       | 1603 vs,sp,<br>1609 vs,sp | 1115 s,sp         | 1336 m,sp |
| [La <sub>0.95</sub> Eu <sub>0.05</sub> (Pip) <sub>3</sub> Phen ] | -                                       | 1603 vs,sp,<br>1609 vs,sp | 1110 s,sp         | 1335 m,sp |

<sup>a</sup> s: strong, vs: very strong, m: medium, b: broad, sp: sharp

**Table S3.** The distances of the chelate cycle atoms from coordination bond planes

| <b>Nd(Pip)<sub>3</sub>Phen</b> |                            |                                                                                       |
|--------------------------------|----------------------------|---------------------------------------------------------------------------------------|
| Atom                           | Distances from plane, d[Å] |                                                                                       |
| Plane Nd1A                     | O2A P1A N3A C13A O1A       | 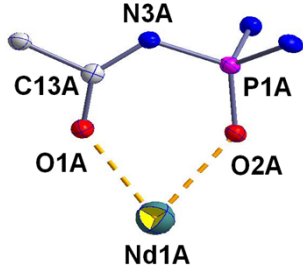    |
| Nd1A                           | 0.0009                     |                                                                                       |
| O2A                            | -0.1449                    |                                                                                       |
| P1A                            | 0.0071                     |                                                                                       |
| N3A                            | 0.1263                     |                                                                                       |
| C13A                           | 0.0254                     |                                                                                       |
| O1A                            | -0.1172                    |                                                                                       |
| Plane Nd1A                     | O4A P2A N6A C25A O3A       |    |
| Nd1A                           | 0.0005                     |                                                                                       |
| O4A                            | -0.0888                    |                                                                                       |
| P2A                            | -0.0351                    |                                                                                       |
| N6A                            | 0.3018                     |                                                                                       |
| C25A                           | 0.1604                     |                                                                                       |
| O3A                            | -0.2271                    |                                                                                       |
| Plane Nd1A                     | O6A P3A N9A C37A O5A       |   |
| Nd1A                           | 0.0009                     |                                                                                       |
| O6A                            | -0.0434                    |                                                                                       |
| P3A                            | -0.0122                    |                                                                                       |
| N9A                            | 0.2075                     |                                                                                       |
| C37A                           | 0.0932                     |                                                                                       |
| O5A                            | -0.1984                    |                                                                                       |
| Plane Nd2                      | O2B P1B N3B C13B O1B       |  |
| Nd2                            | 0.0008                     |                                                                                       |
| O2B                            | -0.0280                    |                                                                                       |
| P1B                            | -0.0157                    |                                                                                       |
| N3B                            | 0.2669                     |                                                                                       |
| C13B                           | 0.0990                     |                                                                                       |
| O1B                            | -0.1879                    |                                                                                       |
| Plane Nd2                      | O4B P2B N6B C25B O3B       |  |
| Nd2                            | 0.0005                     |                                                                                       |
| O4B                            | 0.0967                     |                                                                                       |
| P2B                            | -0.0380                    |                                                                                       |
| N6B                            | 0.3142                     |                                                                                       |
| C25B                           | 0.1725                     |                                                                                       |
| O3B                            | -0.2378                    |                                                                                       |
| Plane Nd2                      | O6B P3B N9B C37B O5B       |  |
| Nd2                            | 0.0002                     |                                                                                       |
| O6B                            | 0.0528                     |                                                                                       |
| P3B                            | -0.0184                    |                                                                                       |
| N9B                            | 0.1369                     |                                                                                       |
| C37B                           | 0.0871                     |                                                                                       |
| O5B                            | -0.1187                    |                                                                                       |

| <b>Eu(Pip)<sub>3</sub>Phen</b> |                            |  |
|--------------------------------|----------------------------|--|
|                                | Plane Eu1 O3 P1 N4 C13 O4  |  |
| Eu1                            | 0.0005                     |  |
| O3                             | -0.0741                    |  |
| P1                             | -0.0362                    |  |
| N4                             | 0.3058                     |  |
| C13                            | 0.1460                     |  |
| O4                             | -0.2314                    |  |
|                                | Plane Eu1 O5 P2 N10 C37 O6 |  |
| Eu1                            | 0.0006                     |  |
| O5                             | -0.0300                    |  |
| P2                             | -0.0122                    |  |
| N10                            | 0.1695                     |  |
| C37                            | 0.0826                     |  |
| O6                             | -0.1662                    |  |
|                                | Plane Eu1 O1 P3 N7 C25 O2  |  |
| Eu1                            | 0.0010                     |  |
| O1                             | -0.1610                    |  |
| P3                             | 0.0037                     |  |
| N7                             | 0.2207                     |  |
| C25                            | -0.0102                    |  |
| O2                             | -0.1613                    |  |
| <b>Tb(Pip)<sub>3</sub>Phen</b> |                            |  |
|                                | Plane Tb1 O2 P1 N3 C13 O1  |  |
| Tb1                            | -0.0008                    |  |
| O2                             | 0.2147                     |  |
| P1                             | -0,0199                    |  |
| N3                             | -0,1398                    |  |
| C13                            | 0.0070                     |  |
| O1                             | 0.1934                     |  |
|                                | Plane Tb1 O4 P2 N6 C25 O3  |  |
| Tb1                            | 0.0006                     |  |
| O4                             | -0.1802                    |  |
| P2                             | 0.0071                     |  |
| N6                             | 0.2537                     |  |
| C25                            | 0.0228                     |  |
| O3                             | -0.2447                    |  |
|                                | Plane Tb1 O6 P3 N9 C37 O5  |  |
| Tb1                            | -0.0007                    |  |
| O6                             | 0.1001                     |  |
| P3                             | -0,0072                    |  |
| N9                             | -0,2982                    |  |
| C37                            | -0.1371                    |  |
| O5                             | 0.2101                     |  |

\* shaded gray the atoms with the maximum deviations

**Table S4** The angles around the phosphorus atom, (°)

| <b>Nd(Pip)<sub>3</sub>Phen</b>                                                                                       |  |
|----------------------------------------------------------------------------------------------------------------------|--|
| <p>O2A P1A N3A 114.65(17)<br/> O2A P1A N4A 114.84(18)<br/> O2A P1A N5A 107.72(17)<br/> N3A P1A N5A 111.97(19)</p>    |  |
| <p>O4A P2A N6A 116.68(15)<br/> O4A P2A N7A 114.34(19)<br/> O4A P2A N8A 108.08(16)<br/> N8A P2A N6A 110.83(19)</p>    |  |
| <p>O6A P3A N9A 114.84(17)<br/> O6A P3A N10A 107.61(15)<br/> O6A P3A N11A 115.91(17)<br/> N11A P3A N9A 104.59(16)</p> |  |
| <p>O2B P1B N3B 116.05(18)<br/> O2B P1B N4B 108.05(18)<br/> O2B P1B N5B 115.04(19)<br/> N3B P1B N5B 103.3(2)</p>      |  |
| <p>O4B P2B N6B 116.51(15)<br/> O4B P2B N7B 114.20(18)<br/> O4B P2B N8B 108.97(16)<br/> N6B P2B N8B 109.91(19)</p>    |  |
| <p>O6B P3B N9B 114.68(17)<br/> O6B P3B N10B 107.57(15)<br/> O6B P3B N11B 115.77(17)<br/> N11B P3B N9B 105.23(16)</p> |  |
| <b>Eu(Pip)<sub>3</sub>Phen</b>                                                                                       |  |
| <p>O3 P1 N4 116.22(15)<br/> O3 P1 N5 114.54(17)<br/> O3 P1 N6 108.30(14)<br/> N6 P1 N4 110.75(18)</p>                |  |

|                                                                                                            |                                                                                      |
|------------------------------------------------------------------------------------------------------------|--------------------------------------------------------------------------------------|
| <p>O5 P2 N10 113.78(15)<br/> O5 P2 N11 107.70(15)<br/> O5 P2 N12 116.32(16)<br/> N12 P2 N10 104.80(16)</p> | 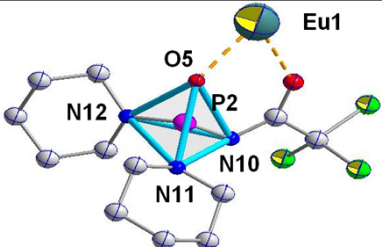   |
| <p>O1 P3 N7 116.34(16)<br/> O1 P3 N8 114.51(16)<br/> O1 P3 N9 107.35(16)<br/> N7 P3 N9 108.19(17)</p>      |    |
| <b>Tb(Pip)<sub>3</sub>Phen</b>                                                                             |                                                                                      |
| <p>O2 P1 N3 116.34(19)<br/> O2 P1 N4 113.9(2)<br/> O2 P1 N5 108.5(2)<br/> N5 P1 N3 110.0(2)</p>            |    |
| <p>O4 P2 N6 116.35(19)<br/> O4 P2 N7 112.5(2)<br/> O4 P2 N8 107.8(2)<br/> N6 P2 N8 109.4(2)</p>            |   |
| <p>O6 P3 N9 115.1(2)<br/> O6 P3 N10 108.0(3)<br/> O6 P3 N11 115.0(2)<br/> N11 P3 N9 103.8(2)</p>           |  |

\* shaded gray the atoms with the maximum deviations

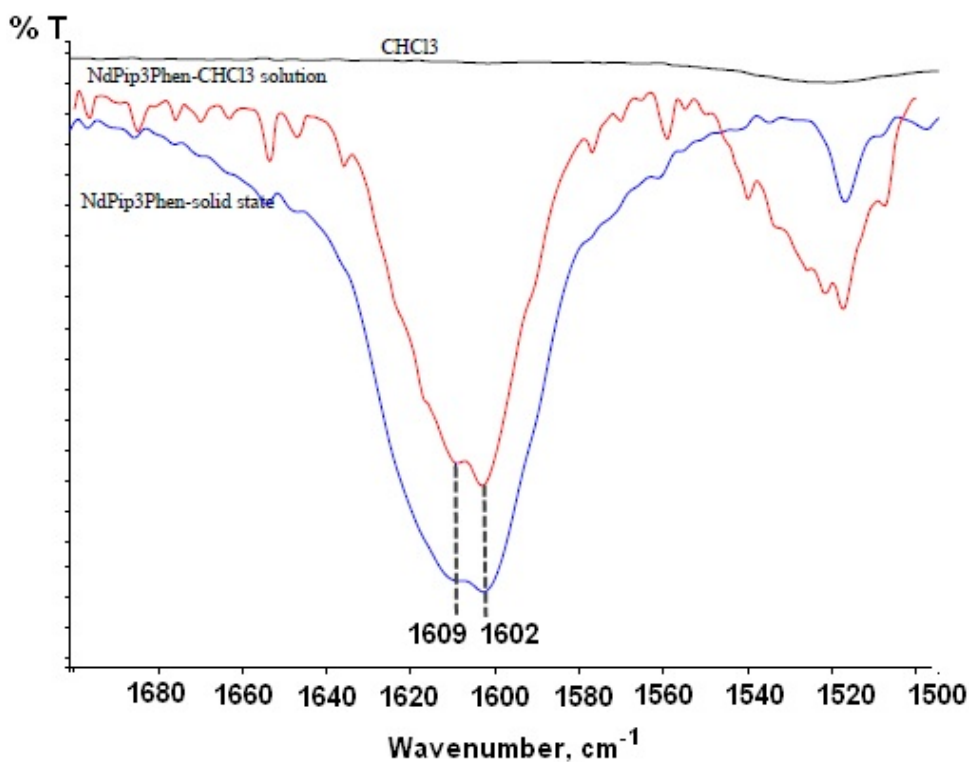

**Fig. 1S** FT-IR spectra of [Nd(Pip)<sub>3</sub>Phen] in solid state and in the CHCl<sub>3</sub> solution

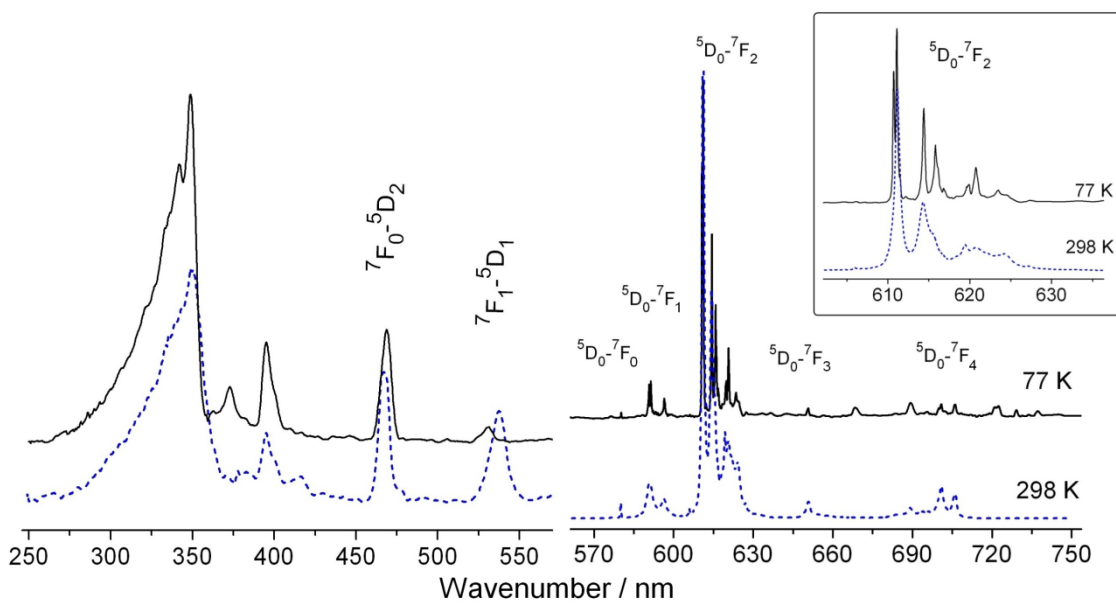

**Fig. 2S** Solid-state excitation and emission for [Eu(Pip)<sub>3</sub>(Phen)] excited at 337 nm, emission monitored at 612 nm at 298 K compared to 77 K. The  $^5D_0 \rightarrow ^7F_2$  transition in the emission spectrum is shown in the inset

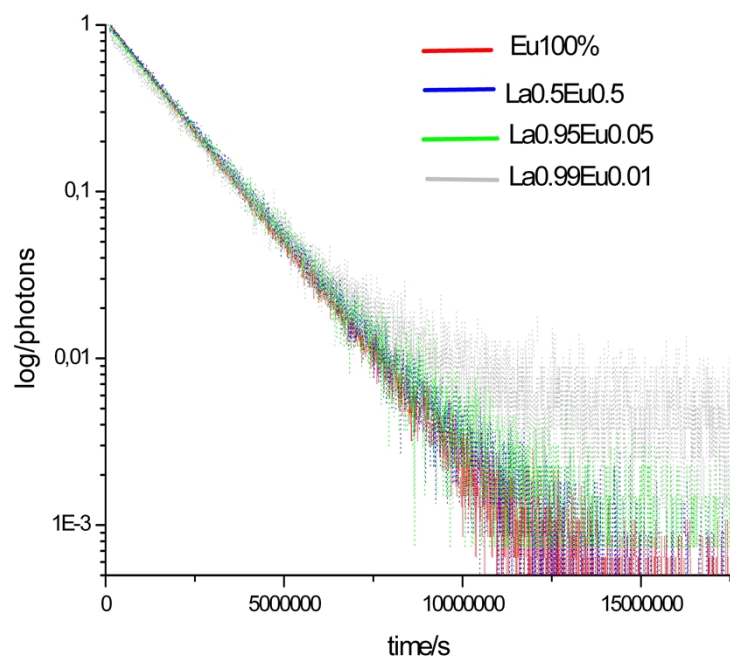

**Fig. 3S** The luminescence decay curves recorded at 77 K

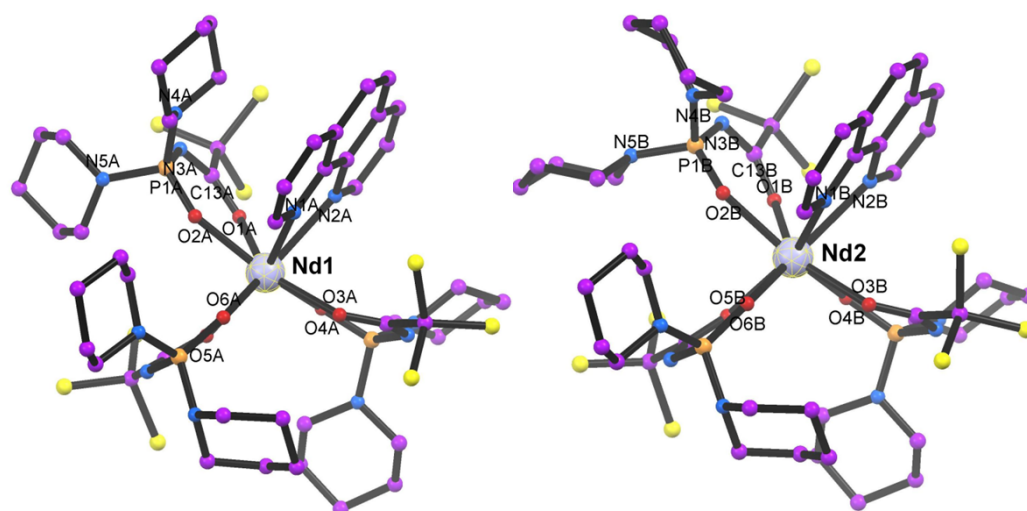

**Fig. 4S** The view of the  $[\text{Nd}(\text{Pip})_3(\text{Phen})]$  asymmetric unit with the atom numbering scheme. H atoms have been omitted



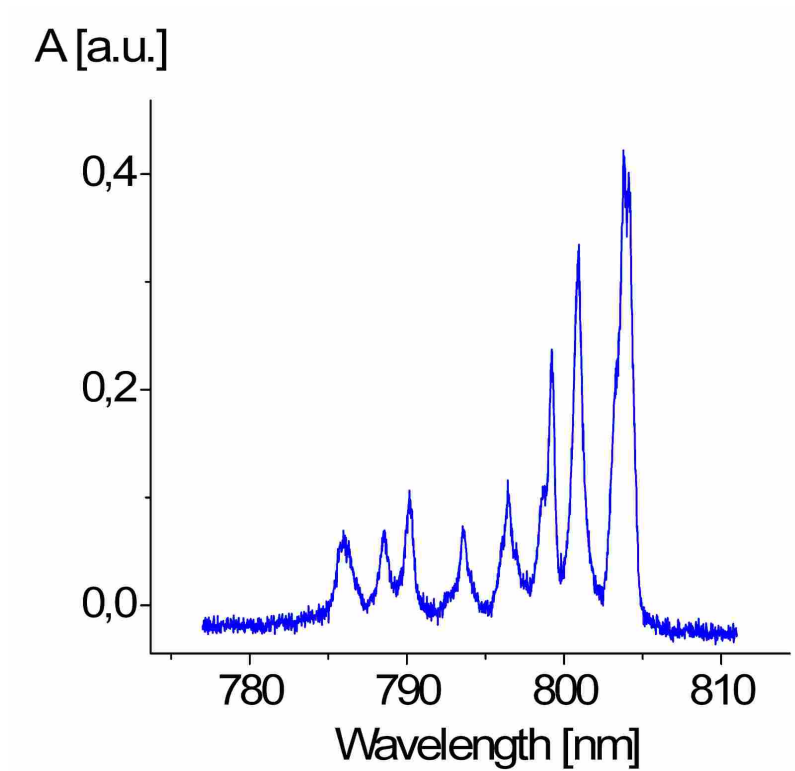

**Fig. 5S** Electronic diffuse reflection spectrum of [Nd(Pip)<sub>3</sub>(Phen)] at 4 K in the 770-810 nm region
